# Supplementary material for: Effects of universally offered parenting interventions for parents with infants: a systematic review
Source: PubMed Central journal article supplement — BMJ Open. 2016 Sep 28;6(9):e011706. doi: 10.1136/bmjopen-2016-011706 (PMC5051433; doi:10.1136/bmjopen-2016-011706), 2016-09-28
Supplement: bmjopen-2016-011706supp_table1.pdf [file bmjopen-2016-011706supp_table1.pdf]

Online table 1 Risk of Bias of included studies

|                                 |                                                                         | Sequence generation | Allocation concealment | Blinding of outcome assessor | Incomplete outcome data addressed | Free of selective reporting | A priori protocol | Free of other bias |
|---------------------------------|-------------------------------------------------------------------------|---------------------|------------------------|------------------------------|-----------------------------------|-----------------------------|-------------------|--------------------|
|                                 | <b>Outcome measures /Risk of bias domains</b>                           |                     |                        |                              |                                   |                             |                   |                    |
| <b>Child development</b>        |                                                                         |                     |                        |                              |                                   |                             |                   |                    |
| Feinberg & Kan 2008*            | Infant regulation (IBQ-R) & child sleep habits                          | U                   | U                      | 3                            | 1                                 | U                           | U                 | 1                  |
| Feinberg et al. 2009*           | Child regulation                                                        | U                   | U                      | 1                            | 1                                 | U                           | U                 | 1                  |
| Feinberg et al. 2010            |                                                                         | U                   | U                      | -                            | -                                 | -                           | U                 | -                  |
|                                 | Adaptive and maladaptive functioning (CBCL)                             | -                   | -                      | 3                            | 2                                 | U                           | -                 | 3                  |
|                                 | Social and emotional competence (Head Start Competence Scale)           | -                   | -                      | 3                            | 2                                 | U                           | -                 | 1                  |
| Solmeyer et al. 2014*           | Child adjustment problems                                               | U                   | U                      | 1                            | 3                                 | U                           | U                 | 1                  |
| Hiscock et al. 2008*            | Adaptive and maladaptive functioning (CBCL)                             | L                   | L                      | 3                            | 1                                 | 1                           | Yes               | 1                  |
| Bayer et al. 2010*              | Adaptive and maladaptive functioning (CBCL)                             | L                   | L                      | 3                            | U                                 | 1                           | Yes               | 1                  |
| Aronen 1993*                    | Mental State (Rutter Scale A)                                           | L                   | H                      | 3                            | 2                                 | U                           | U                 | 1                  |
| Aronen & Kurkela 1996           |                                                                         | L                   | H                      | -                            | -                                 | -                           | U                 | -                  |
|                                 | Adaptive and maladaptive functioning (CBCL)                             | -                   | -                      | 3                            | U                                 | U                           | -                 | 1                  |
|                                 | Adaptive and maladaptive functioning (YSR)                              | -                   | -                      | 2                            | U                                 | U                           | -                 | 1                  |
| Aronen & Kurkela 1998           |                                                                         | L                   | H                      | -                            | -                                 | -                           | U                 |                    |
|                                 | Competence (CBCL)                                                       | -                   | -                      | 3                            | U                                 | U                           | -                 | 1                  |
|                                 | Competence (YSR)                                                        | -                   | -                      | 2                            | U                                 | U                           | -                 | 1                  |
| Aronen & Arajärvi 2000*         | Adaptive and maladaptive functioning (YASR) & depressive symptoms (BDI) | L                   | H                      | 1                            | U                                 | U                           | U                 | 1                  |
| Minkovitz et al. 2007           |                                                                         | L                   | U                      | -                            | -                                 | -                           | Yes               | -                  |
|                                 | Adaptive and maladaptive functioning (CBCL)                             | -                   | -                      | 3                            | 2                                 | U                           | -                 | 2                  |
|                                 | Development (PEDS) & Social Skills (SSRS)                               | -                   | -                      | 3                            | 2                                 | U                           | -                 | 3                  |
| <b>Parent-child interaction</b> |                                                                         |                     |                        |                              |                                   |                             |                   |                    |
| Feinberg et al. 2009*           | Parent-child relationship                                               | U                   | U                      | 1                            | 1                                 | U                           | U                 | 1                  |
| Doherty et al. 2006*            | Father-child relationship (Parent Behavior Rating Scale)                | L                   | H                      | U                            | 3                                 | U                           | U                 | 1                  |
| Vlismas et al. 2013*            | Parent-child relationship (Maternal Postnatal Attachment Scale)         | U                   | U                      | 3                            | 1                                 | U                           | U                 | U                  |
| Dickie & Gerber 1980*           | Frequency of infant-initiated contact                                   | U                   | U                      | 1                            | 1                                 | 4                           | U                 | U                  |

\*Note: Risk of bias was conducted for each outcome. When risk of bias was the same for all included outcomes, only one score is provided in the table.

Note: In the 5-point scale 1 corresponds to low risk of bias and 5 correspond to high risk of bias. L= low risk of bias; H=high risk of bias; U= unclear risk of bias

IBQ-R: Infant Behavior Questionnaire-Revised

CBCL: Child Behavior Checklist

YSR: Youth Self Report

YASR: Young Adult Self Report

PEDS: Parents' Evaluation of Development Status

SSRS: Social Skills Rating Scale
